1   Physiological and molecular responses of a newly evolved  
2   auxotroph of *Chlamydomonas* to B<sub>12</sub> deprivation

3

4   Running title: Adaptation of *Chlamydomonas* to limiting B<sub>12</sub>

5

6   Freddy Bunbury<sup>1</sup>, Katherine E Helliwell<sup>2</sup>, Payam Mehrshahi<sup>1</sup>, Matthew P Davey<sup>1</sup>, Deborah  
7   Salmon<sup>3</sup>, Andre Holzer<sup>1</sup>, Nicholas Smirnoff<sup>3</sup> and Alison G Smith<sup>1\*</sup>

8

9   <sup>1</sup>Department of Plant Sciences, University of Cambridge, Downing Street, Cambridge, CB2 3EA,  
10   UK

11   <sup>2</sup>Marine Biological Association of the UK, Citadel Hill, Plymouth, UK

12   <sup>3</sup>School of Biosciences, University of Exeter, Exeter, UK

13

14   \*Corresponding author

15   Email: [as25@cam.ac.uk](mailto:as25@cam.ac.uk)

16   Address: Department of Plant Sciences, Downing Street, Cambridge, CB2 3EA, UK

17   Tel: +44-1223 333952

18   Fax: +44-1223-333953

19

20

21 **Abstract**

22

23 The corrinoid B<sub>12</sub> is synthesised only by prokaryotes yet is widely required by eukaryotes as  
24 an enzyme cofactor. Microalgae have evolved B<sub>12</sub> dependence on multiple occasions and we  
25 previously demonstrated that experimental evolution of the non-requiring alga  
26 *Chlamydomonas reinhardtii* in media supplemented with B<sub>12</sub> generated a B<sub>12</sub>-dependent  
27 mutant (hereafter metE7). This clone provides a unique opportunity to study the physiology  
28 of a nascent B<sub>12</sub> auxotroph. Our analyses demonstrate that B<sub>12</sub> deprivation of metE7  
29 disrupted C1 metabolism, caused an accumulation of starch and triacylglycerides and a  
30 decrease in photosynthetic pigments, proteins and free amino acids. B<sub>12</sub> deprivation also  
31 caused a substantial increase in reactive oxygen species (ROS), which preceded rapid cell  
32 death. Surprisingly, survival could be improved without compromising growth by  
33 simultaneously depriving the cells of nitrogen, suggesting a type of cross protection.  
34 Significantly, we found further improvements in survival under B<sub>12</sub> limitation and an increase  
35 in B<sub>12</sub> use-efficiency after metE7 underwent a further period of experimental evolution, this  
36 time in coculture with a B<sub>12</sub>-producing bacterium. Therefore, although an early B<sub>12</sub>-  
37 dependent alga would likely be poorly adapted to B<sub>12</sub> deprivation, association with B<sub>12</sub>-  
38 producers can ensure long-term survival whilst also providing the environment to evolve  
39 mechanisms to better tolerate B<sub>12</sub> limitation.

40

41 **Keywords**

42 *Chlamydomonas reinhardtii*, symbiosis, experimental evolution, vitamin B<sub>12</sub>, auxotrophy,  
43 algae

44

45

## 46 Introduction

47

48 Over 50% of algal species require an exogenous source of B<sub>12</sub> for growth (1), yet  
49 large areas of the ocean are depleted of this vitamin (2, 3). Eukaryotic algae cannot  
50 synthesise B<sub>12</sub>, but must instead obtain it from certain prokaryotes that can (1). Indeed,  
51 whilst dissolved B<sub>12</sub> concentrations are positively correlated with bacterioplankton density (4,  
52 5), they have been found to negatively correlate with phytoplankton abundance (6, 7).  
53 Furthermore, nutrient amendment experiments suggests B<sub>12</sub> limits phytoplankton growth in  
54 many aquatic ecosystems (8–10). Despite this, understanding of the physiological and  
55 metabolic adaptations that B<sub>12</sub>-dependent algae employ to cope with B<sub>12</sub> deprivation is rather  
56 limited.

57

58 In many algae B<sub>12</sub> is required as a cofactor for the B<sub>12</sub>-dependent methionine  
59 synthase enzyme (METH) (11), although some algae encode a B<sub>12</sub>-independent isoform of  
60 this enzyme (METE) and do not require B<sub>12</sub> for growth. Bertrand et al (12), showed that the  
61 B<sub>12</sub>-dependent marine diatom *Thalassiosira pseudonana*, which encodes only METH,  
62 responds to B<sub>12</sub> scarcity by increasing uptake capacity and altering the expression of  
63 enzymes involved in C1 metabolism. Heal et al (13) found that despite these responses B<sub>12</sub>  
64 deprivation disrupted the central methionine cycle, transsulfuration pathway and polyamine  
65 biosynthesis. *Phaeodactylum tricornutum*, a marine diatom which uses but does not depend  
66 on B<sub>12</sub> (encoding both METE and METH), responds similarly to *T. pseudonana* (12) but can  
67 also rely on increasing expression of METE to maintain the production of methionine.  
68 Phylogenetic analysis of the *METE* gene among diatoms shows no simple pattern of gene  
69 loss or gain, as indeed is the case across the eukaryotes (14, 15), but there is a clear link  
70 between the lack of a functional copy of the *METE* gene and B<sub>12</sub>-dependence (11, 16).

71 As with the diatoms, the phylogenetic distribution of *METE* within the *Volvocales* (a  
72 family of green freshwater algae) points to gene loss on several independent occasions. The  
73 genomes of two volvocalean algae, *V. carteri* and *G. pectorale*, contain *METE* pseudogenes  
74 indicating that B<sub>12</sub> dependence has evolved relatively recently in these species (11).  
75 *Chlamydomonas reinhardtii* is a related alga that encodes a functional copy of *METE* and so  
76 is B<sub>12</sub>-independent. Helliwell et al. (17) generated a *METE* mutant of *C. reinhardtii* by  
77 experimental evolution in conditions of high vitamin B<sub>12</sub> concentration, demonstrating that  
78 sustained levels of B<sub>12</sub> in the environment can drive *METE* gene loss. This mutant, which  
79 contained a Gulliver-related transposable element in the 9<sup>th</sup> exon of the *METE* gene, was  
80 completely reliant on B<sub>12</sub> for growth but in the presence of the vitamin it was able to  
81 outcompete its B<sub>12</sub>-independent progenitor. In the absence of B<sub>12</sub> the *METE* mutant would  
82 sometimes revert to B<sub>12</sub> independence and resume growth. Reversion was found to be due

83 to excision of the transposon to leave behind a wild-type *METE* gene sequence, but there  
84 was a single case where 9 bp fragment of the transposon was left behind resulting in a  
85 stable B<sub>12</sub>-dependent strain hereafter called metE7.

86

87 *C. reinhardtii* is a well-researched model organism that has been instrumental in  
88 improving our understanding of algal photosynthesis, ciliogenesis, and responses to  
89 fluctuating nutrient environments (18–20). We wanted to use the metE7 mutant of *C.*  
90 *reinhardtii* to study how recently acquired B<sub>12</sub> auxotrophy impacts an organism's fitness and  
91 physiology, and to provide insight into the metabolic challenges that other B<sub>12</sub> dependent  
92 algae might have faced when they first evolved. In this work we characterized the responses  
93 of metE7 to different vitamin B<sub>12</sub> regimes and compared them to the responses of its  
94 ancestral B<sub>12</sub>-independent strain, and to a closely related, naturally B<sub>12</sub>-dependent alga  
95 *Lobomonas rostrata*. The responses of metE7 to B<sub>12</sub> deprivation were quantified by  
96 measuring changes in gene expression, cellular composition, photosynthetic activity and  
97 viability, and were contrasted against changes under nitrogen deprivation. To assess  
98 whether a recently evolved algal B<sub>12</sub> auxotroph could improve its survival during B<sub>12</sub>  
99 deprivation relatively quickly, we subjected metE7 to a further experimental evolution period  
100 of several months in limited B<sub>12</sub> or coculture with a B<sub>12</sub> producing bacterium and  
101 characterised the resulting lines.

102

## 103 **Materials and Methods**

### 104 **Strains**

105

106 *Mesorhizobium loti* (MAFF 303099) was a gift from Prof. Allan Downie at the John  
107 Innes Centre, Norwich, UK. Algal strains used in this study are shown in Table S1 and  
108 include *Lobomonas rostrata* (SAG 45/2), as well as several *Chlamydomonas reinhardtii*  
109 strains derived from strain 12 of wild type 137c or the cell wall-deficient strain cw15. The  
110 stable B<sub>12</sub>-dependent metE7, the unstable B<sub>12</sub>-dependent (S-type) as well as the B<sub>12</sub>-  
111 independent revertant line (R-type) all evolved from the strain 12 of wild type 137c  
112 (Ancestral) as described by Helliwell et al. (2015). Another B<sub>12</sub>-dependent mutant (metE4)  
113 was generated by targeted (CRISPR/Cpf1) knockout of the *METE* gene in the UVM4 strain  
114 using the protocol described in Ferenczi et al. 2017 (21),

### 115 **Culture conditions and growth measurements**

116

117 Algal colonies were maintained quarterly on Tris-acetate phosphate (TAP) + 1000  
118  $\text{ng}\cdot\text{l}^{-1}$  cyanocobalamin ( $\text{B}_{12}$ ) agar (1.5%) in sealed transparent plastic tubes at room  
119 temperature and ambient light. Cultures were grown in TAP or Tris min medium under  
120 continuous light or a light-dark period of 16hr-8hr, at  $100 \mu\text{E}\cdot\text{m}^{-2}\cdot\text{s}^{-1}$ , at a temperature of  
121  $25^\circ\text{C}$ , with rotational shaking at 120 rpm in an incubator (InforsHTMultitron; Switzerland). For  
122 nutrient starvation experiments the pre-culture TAP media contained  $200 \text{ng}\cdot\text{l}^{-1}$  of  $\text{B}_{12}$ , and  
123 when cell densities surpassed  $1\cdot 10^6 \text{ cells}\cdot\text{ml}^{-1}$  or an OD730 nm of 0.2, cultures were  
124 centrifuged at 2,000 g for 2 minutes, followed by supernatant removal and resuspension of  
125 the cell pellet in media.

126

127 Algal cell density and optical density at 730 nm were measured using a Z2 particle  
128 count analyser (Beckman Coulter Ltd.) with limits of 2.974-9.001  $\mu\text{m}$ , and a FluoStar Optima  
129 (BMG labtech) or Thermo Spectronic UV1 spectrophotometer (ThermoFisher) respectively.  
130 Mean cell diameter was also quantified on a Z2 particle analyser (Beckman Coulter Ltd.).  
131 Dry mass was measured by filtering 20 ml of culture through pre-dried and weighed grade 5  
132 whatmann filter paper (Sigma-Aldrich WHA1005090), drying at  $70^\circ\text{C}$  for 24 hours, followed  
133 by further weighing on a Secura mass balance (Sartorius). Algal and bacterial CFU $\cdot\text{ml}$  were  
134 determined by plating on solid media.

### 135 **Measurement of photosynthetic parameters**

136

137 200  $\mu\text{l}$  of cultures with an OD730 nm  $> 0.1$  were transferred to a 96 well plate which  
138 was then incubated at  $25^\circ\text{C}$  in the dark for 20 minutes.  $F_0$  was measured prior to, and  $F_m$   
139 during, a saturating pulse at  $6172 \mu\text{E}\cdot\text{m}^{-2}\cdot\text{s}^{-1}$ . The light intensity was increased to  $100 \mu\text{E}\cdot\text{m}^{-2}\cdot\text{s}^{-1}$   
140 and the cells allowed to acclimate for 30 seconds prior to another set of fluorescence  
141 measurements before and during a saturating pulse. From these fluorescence  
142 measurements the CF imager software calculated non-photochemical quenching ( $F_m/F_m' - 1$ ),  
143 PSII maximum efficiency ( $F_v'/F_m'$ ), and the coefficient of photochemical quenching  
144 ( $F_q'/F_v'$ ) at each light intensity.

### 145 **Measurement of cellular biochemical composition**

146

147 Lipids were extracted from the cell pellet from 10 ml of culture using the  
148 chloroform/methanol/water method and triacylglycerides (TAGs), polar lipids and free fatty  
149 acids in the total lipid extract and total fatty acid methyl esters (FAMES) were analysed by  
150 GC-FID and GC-MS, as described in Davey et al. (2014) (22). A 1 ml aliquot of algal culture  
151 was used for pigment and starch quantification as described in Davey et al. (2014), and a 10

152 ml aliquot for protein quantification using a Bradford assay and amino acids by HPLC as  
153 described in Helliwell et al. (2018) (23).

#### 154 **Reactive oxygen species quantification**

155

156 2  $\mu$ l of 1 mM 2',7' Dichlorofluorescein diacetate (Sigma-Aldrich) dissolved in DMSO  
157 was added to 198  $\mu$ l of cell culture in a black f-bottom 96 well plate (Greiner bio-one) and  
158 incubated at room temperature in the dark for 60 minutes before recording fluorescence at  
159 520 nm after excitation at 485 nm in a FluoStar Optima Spectrophotometer (BMG labtech).  
160 Fresh cell culture media devoid of any cells was used as a blank.

#### 161 **SAM and SAH quantification**

162

163 10 ml of samples were centrifuged at 2,000 g for 2 minutes, supernatant removed,  
164 and cell pellet lyophilised at  $<-40^{\circ}\text{C}$  and  $<10$  pascals for 12-24 hours. 300  $\mu$ l of 10%  
165 methanol (LC-MS grade) spiked with stable isotope-labelled amino acids (L-amino acid mix,  
166 Sigma-Aldrich, Co., St. Louis, MO, USA) was added to each sample. They were vortexed 3  
167 times, every 10 min, before sonicating for 15 min in an iced water bath then centrifuging  
168 (16,100 x g) for 15 min at  $4^{\circ}\text{C}$ . Quantitative analysis was performed on 150  $\mu$ l of supernatant  
169 using an Agilent 6420B triple quadrupole (QQQ) mass spectrometer (Agilent Technologies,  
170 Palo Alto, USA) coupled to a 1200 series Rapid Resolution HPLC system. Details of the  
171 HPLC-MS are given in the supplementary information.

#### 172 **Transcript quantification**

173

174 Total RNA extraction was performed on the cell pellet from 10 ml of algal culture  
175 using the RNeasy® Plant Mini Kit (QIAGEN). DNase treatment was carried out using  
176 TURBO DNA-free™ kit (Ambion), and cDNA synthesis using SuperScript®III First-Strand  
177 synthesis system for RT-PCR (Invitrogen) according to the manufacturer's instructions. RT-  
178 qPCR was performed as described by Helliwell et al. 2018 (24), using primers listed in Table  
179 S2

#### 180 **Artificial Evolution setup**

181

182 A culture of metE7 cells was plated on TAP +1000  $\text{ng}\cdot\text{l}^{-1}$  B<sub>12</sub> agar, then 8 colonies  
183 picked and resuspended in TAP + 200  $\text{ng}\cdot\text{l}^{-1}$  B<sub>12</sub> in a 96 well plate. Each well was split into 3

184 wells, each in a different 96 well plate containing 200  $\mu\text{l}$  of a different media: TAP +1000  $\text{ng}\cdot\text{l}^{-1}$   
185  $\text{B}_{12}$ , TAP +25  $\text{ng}\cdot\text{l}^{-1}$   $\text{B}_{12}$ , and TP medium. *M. loti* was prepared in a similar manner to metE7,  
186 except preculturing was performed in TP + 0.01% glycerol. *M. loti* was added to the TP  
187 culture containing metE7 at a density roughly 20 times greater than the alga. The 96 well  
188 plates were incubated at 25°C, under continuous light at 100  $\mu\text{E}\cdot\text{m}^{-2}\cdot\text{s}^{-1}$ , on a shaking  
189 platform at 120 rpm. Each week the cultures were diluted: Those in TAP +1000  $\text{ng}\cdot\text{l}^{-1}$   $\text{B}_{12}$   
190 were diluted 10,000-fold, TAP +25  $\text{ng}\cdot\text{l}^{-1}$   $\text{B}_{12}$  = 100-fold, and TP = 5-fold. Every three weeks  
191 10  $\mu\text{l}$  of serial dilutions of each culture was also spotted onto TAP agar + Ampicillin (50  
192  $\mu\text{g}\cdot\text{ml}^{-1}$ ) and Kasugamycin (75  $\mu\text{g}\cdot\text{ml}^{-1}$ ) and TAP agar + 1000  $\text{ng}\cdot\text{l}^{-1}$   $\text{B}_{12}$  to check for  $\text{B}_{12}$ -  
193 independent *C. reinhardtii*, or bacterial contaminants and to act as a reserve in the case of  
194 contamination. If cultures were found to be contaminated, then at the next transfer they were  
195 replaced by colonies from the same well that had grown on the TAP agar plates. At four  
196 points during the 12-month evolution period all cultures were transferred to TAP agar plates  
197 where they were stored for 2 weeks during an absence from the lab, meaning that the total  
198 time in liquid culture was 10 months. See Fig S9 for an illustration of the experimental  
199 evolution setup and the tests of  $\text{B}_{12}$  dose response and viability during  $\text{B}_{12}$  deprivation that  
200 were performed on the evolved lines.

201

202

203 **Results**

204

205 ***B<sub>12</sub> deprivation causes substantial changes to C1 metabolism in the metE7 mutant***

206 Methionine synthase plays a central role in the C1 cycle (Fig. 1A), and thus facilitates  
207 nucleotide synthesis and production of the universal methyl donor S-adenosylmethionine,  
208 which is essential for many biosynthetic and epigenetic processes (25, 26). Wild-type (WT)  
209 *C. reinhardtii* can operate these cycles in the absence of B<sub>12</sub> using the methionine synthase  
210 variant METE, but metE7 relies solely on the B<sub>12</sub>-requiring METH isoform. Before  
211 investigating the effect of B<sub>12</sub> deprivation on C1 metabolism in metE7 we first wanted to  
212 eliminate the possibility that other mutations in the experimentally evolved metE7 line might  
213 account for its B<sub>12</sub> dependent phenotype. We therefore generated an independent *METE*  
214 mutant line (metE4) using CRISPR/Cpf1 (21). This mutant has an in-frame stop codon (Fig.  
215 S1) and, as predicted, exhibits B<sub>12</sub>-dependence. We therefore proceeded to investigate the  
216 effect of B<sub>12</sub> on C1 metabolism in the metE7 line, since its origin is a closer reflection of how  
217 B<sub>12</sub> auxotrophy would have arisen naturally in other algae.

218

219 Both the WT ancestral line and metE7 were precultured in TAP medium in  
220 continuous light with adequate (200 ng·l<sup>-1</sup>) B<sub>12</sub> to maintain a low cellular quota of the vitamin.  
221 The cells were then pelleted, washed and transferred to B<sub>12</sub> replete (1000 ng·l<sup>-1</sup>) or B<sub>12</sub>  
222 deprived (no B<sub>12</sub>) TAP medium at 5×10<sup>5</sup> cells/ml and grown for 30 hours. Steady state  
223 transcript levels of six enzymes in the C1-cycle were then investigated by RT-qPCR (Fig.  
224 1B). In the WT, three transcripts (*METE*, *SAH1*, and *MTHFR*) were significantly (p<0.05)  
225 upregulated by B<sub>12</sub> deprivation, while in metE7 all six (including *METH*, *METM*, and *SHMT2*)  
226 increased. Levels of the methionine cycle metabolites methionine, SAM and SAH were  
227 quantified by HPLC-MS. In the WT there was no difference in methionine, SAM or SAH  
228 levels in the two conditions (Fig. 1C). However, in metE7 cells under B<sub>12</sub> deprivation  
229 methionine levels were raised 6-fold, which was somewhat unexpected given that  
230 methionine synthase activity was impeded. SAH levels were also significantly elevated,  
231 whereas there was no effect on SAM. Consequently, the SAM:SAH ratio decreased by 10-  
232 fold to 3:1 under B<sub>12</sub> deprivation. We then studied the dynamics of these changes by  
233 measuring metabolites and RNA abundance at several points during 3 days of B<sub>12</sub>  
234 deprivation and then for 2 days following add-back of 1000 ng·l<sup>-1</sup> B<sub>12</sub>. The transcripts for all  
235 six tested C1 cycle genes increased rapidly in the first 6 h and then plateaued; reintroduction  
236 of B<sub>12</sub> led to an immediate reduction to near initial amounts (Fig. S2A). Similar profiles were  
237 seen for the metabolites SAM and SAH, although the peak occurred later at 24 h (Fig. S2B).  
238 Methionine levels were more variable, but nonetheless there was a similar trend of a peak  
239 24 h after removal of B<sub>12</sub>. More significantly, the SAM:SAH ratio fell sharply from 30 to less



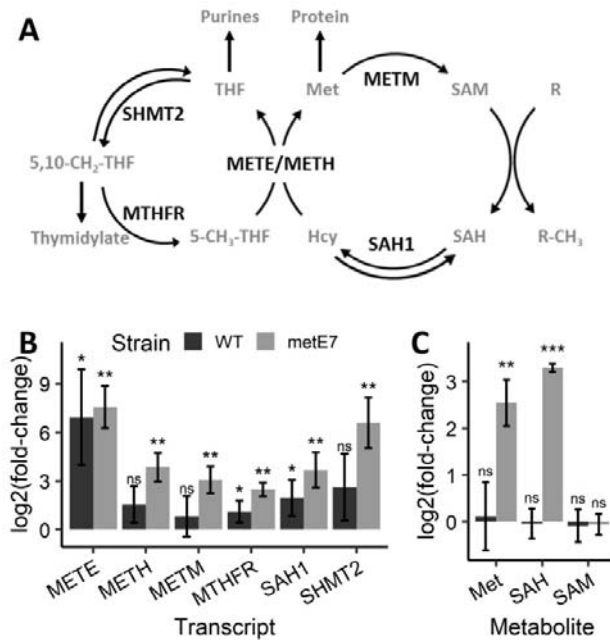

**Figure 1.** C1 cycle metabolites and transcripts increase during B<sub>12</sub> deprivation of metE7. **(A)** Metabolic map of a portion of the C1 cycle centred around METE and METH, with enzyme abbreviations in black, metabolite abbreviations in grey, and arrows depicting enzyme-catalysed reactions. **(B)** Abundance of six transcripts for enzymes of the C1 cycle measured by RT-qPCR on RNA extracted from the ancestral line and metE7 after 30 hours of incubation in mixotrophic conditions with (1000 ng·l<sup>-1</sup>) or without B<sub>12</sub>. **(C)** Abundance of Met, SAM, and SAH metabolites measured by HPLC-MS on the same samples as above. Metabolite and transcript abundances are expressed as levels in B<sub>12</sub>-deprived conditions relative to B<sub>12</sub>-replete conditions and presented on a log<sub>2</sub>() scale. Error bars = sd, n=3-4, 'ns'=not significant, \*p<0.05, \*\*p<0.01, \*\*\*p<0.001, Welch's t test. WT = ancestral B<sub>12</sub>-independent strain, metE7 = experimentally evolved B<sub>12</sub>-dependent line. See also figure S2.

240 than 1 within 24 h. A subsequent gradual increase occurred over the next 2 days, and  
 241 resupply of B<sub>12</sub> increased this ratio further over the following 2 days. The likelihood therefore  
 242 is that many cellular processes would be impacted in B<sub>12</sub>-deprived metE7 cells.

243

### 244 **B<sub>12</sub> deprivation significantly impacts cell physiology and biochemical composition**

245 Our data demonstrate a substantial impact of B<sub>12</sub> limitation on the expression of C1  
 246 metabolic genes as well as the abundance of C1 metabolites. To elucidate downstream  
 247 consequences of perturbed C1 metabolism we also characterised broader physiological  
 248 responses to B<sub>12</sub> deprivation. As has been documented previously (17), growth of metE7  
 249 cells was significantly impaired in B<sub>12</sub>-deprived conditions (Fig. S3A). However, by day 2 the  
 250 B<sub>12</sub> deprived cells had a 36% larger diameter resulting in a 150% increase in volume (Fig. 2A  
 251 and Fig. S3B), indicating that cell division was more restricted than overall growth. Moreover,  
 252 cell viability, which was assayed by the ability of cells to form colonies when plated on B<sub>12</sub>-

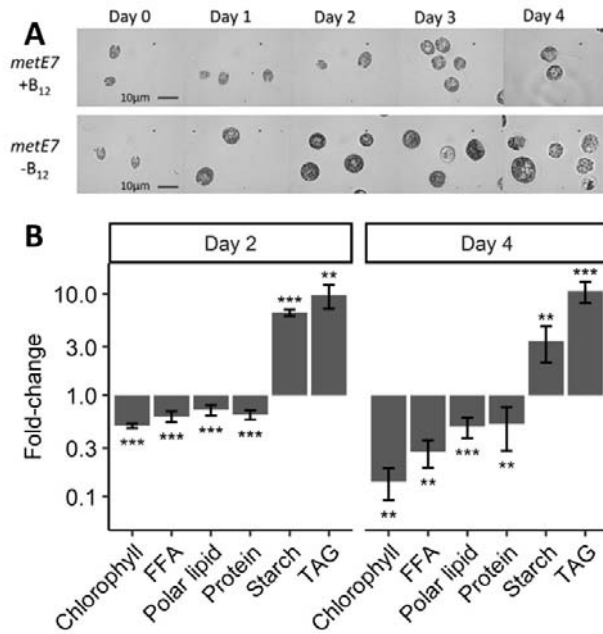

**Figure 2.** B<sub>12</sub> deprivation of *metE7* causes cell enlargement and significant changes in macromolecular composition. **(A)** Microscope photographs taken at 1000x magnification of *metE7* cells grown in TAP medium in B<sub>12</sub> replete (1000 ng·l<sup>-1</sup>) or B<sub>12</sub> deprived (0 ng·l<sup>-1</sup>) conditions over a period of 4 days **(B)** Macromolecular composition of B<sub>12</sub>-deprived cells on day 2 and day 4 of the growth period expressed as mass of those compounds normalised to total cell dry mass and then expressed relative to the amounts in B<sub>12</sub> replete conditions. Error bars = sd, n = 5. \*\*=p<0.01, \*\*\*=p<0.001, Welch's t test.

253 replete TAP agar, decreased to below 25% within 4 days of B<sub>12</sub> limitation (Fig. S3C). This  
 254 was preceded by a reduction in photosystem II maximum efficiency (*Fv/Fm*) (Fig. S3D), an  
 255 often-used indicator of algal stress (27, 28).

256 The biochemical composition of *C. reinhardtii* cells is altered considerably and  
 257 similarly under various nutrient deprivations and so we hypothesised that B<sub>12</sub> limitation would  
 258 also induce broadly the same responses (20, 29, 30). Therefore, *metE7* cells were  
 259 precultured as before in 200 ng·l<sup>-1</sup> B<sub>12</sub>, then washed and resuspended in TAP with (1000  
 260 ng·l<sup>-1</sup>) or without B<sub>12</sub> and cultured mixotrophically for 4 days. Cultures were visually inspected  
 261 by microscopy (Fig. 2A) and the amounts of various cellular components were measured on  
 262 day 2 and 4 (Fig. 2B). Chlorophyll levels declined considerably under B<sub>12</sub> deprivation so that  
 263 by day four the cells had a bleached appearance with an 85% lower concentration than the  
 264 B<sub>12</sub> replete cells. Similarly, free fatty acids (FFA), polar lipids and proteins were at least 50%  
 265 lower under B<sub>12</sub> deprived conditions on day 4. Starch content on the other hand, showed the  
 266 largest absolute increase from B<sub>12</sub> replete to B<sub>12</sub> deprived cells (Fig S3), and triacylglycerides  
 267 were 10-fold higher in B<sub>12</sub>-deprived cells (Fig 2B), which effectively balanced the loss of  
 268 polar lipids and free fatty acids so that overall lipid levels were roughly 8-10% of dry mass in  
 269 both treatments. To look in more detail, quantification of free amino acids and fatty acid

270 composition of all lipid classes was carried out (Fig S4). By day 4 most of the amino acids  
271 decreased significantly under B<sub>12</sub> deprivation. Particularly noteworthy is the reduction in  
272 methionine, in contrast to its elevation at an earlier timepoint, and the increase in glutamine,  
273 the only amino acid to be more abundant in B<sub>12</sub> deprived cells. Overall the degree of fatty  
274 acid saturation was higher under B<sub>12</sub> deprivation, due mainly to an increase in the dominant  
275 saturated fatty acids palmitate (16:0) and stearate (18:0) (Fig. S5B), although levels of  
276 several unsaturated fatty acids, in particular 16:2, 16:3<sup>(7,10,13)</sup>, 18:1 and 18:2, were also  
277 elevated.

278

### 279 **Responses to nitrogen deprivation improve survival under B<sub>12</sub> deprivation**

280 Our results demonstrate that B<sub>12</sub> deprivation of metE7 causes several changes in  
281 biochemical composition akin to those exhibited following nitrogen deprivation of WT *C.*  
282 *reinhardtii*. To further investigate this comparison we measured growth, viability, and  
283 photosynthetic efficiency under both conditions over a timecourse (Fig. S6). metE7 culture  
284 density increased more under B<sub>12</sub> than nitrogen deprivation (Fig. S6A), but started to decline  
285 after day 2, unlike under nitrogen deprivation where growth continued more slowly over 4  
286 days. For cell viability, both conditions caused a decline, but while loss of viability continued  
287 in B<sub>12</sub> deprived cells, under nitrogen deprivation the initial loss was followed by recovery (Fig.  
288 S6B). Maximum photosynthetic efficiency of photosystem II, however, did not recover under  
289 either condition, and its decline was more rapid in nitrogen-deprived cells (Fig. S6C).

290 The increased viability of metE7 under nitrogen compared with B<sub>12</sub> deprivation  
291 suggested to us that either the metabolic role of B<sub>12</sub> would make it intrinsically more difficult  
292 to cope without or that the evolutionary naivety of metE7 to B<sub>12</sub> dependence would mean it  
293 had little time to evolve protective responses to B<sub>12</sub> limitation. We therefore tested whether  
294 responses to nitrogen deprivation could afford some protection against B<sub>12</sub> deprivation.  
295 Viability measurements were monitored over several days, and cultures lacking nitrogen or  
296 B<sub>12</sub> behaved as previously (Fig 3A). However, metE7 cells deprived of both nitrogen and B<sub>12</sub>  
297 simultaneously were more similar to those starved on nitrogen: there was an initial decrease  
298 in viability followed by recovery to a level significantly higher than in B<sub>12</sub> deprivation alone.  
299 As total growth in B<sub>12</sub> and nitrogen deprivation was not significantly different from B<sub>12</sub>  
300 deprivation alone (Fig. S7) this apparent protective mechanism in response to nitrogen  
301 deprivation is not simply a result of inhibiting growth and hence avoiding severe B<sub>12</sub>  
302 starvation.

303 In *C. reinhardtii*, as in many photosynthetic organisms, the absorption of light energy  
304 in excess of that required for metabolism can increase the production of reactive oxygen  
305 species (ROS) (31). To investigate whether the cell death observed under B<sub>12</sub> deprivation of  
306 metE7 could be due to ROS, the general ROS-sensitive dye dihydrodichlorofluorescein

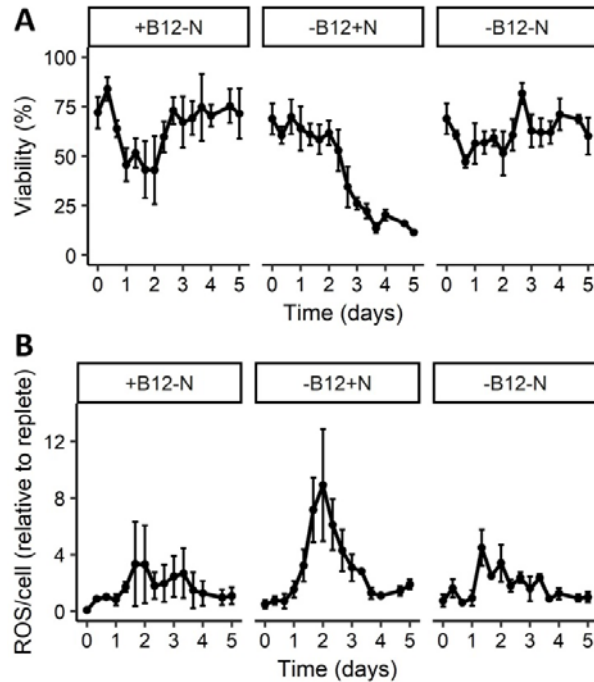

**Figure 3.** *metE7* survives better and produces lower levels of reactive oxygen species (ROS) when limited for both N and B<sub>12</sub> than just B<sub>12</sub> alone. **(A)** Percentage of cells that could form colonies (a measure of viability) on nutrient replete agar when removed at different timepoints from nutrient deprivation conditions (Indicated in panels above the graphs). **(B)** Reactive oxygen species (ROS) measured by dichlorofluorescein diacetate (DCFDA) fluorescence and normalised both on a per cell basis and to the nutrient replete treatment (+B<sub>12</sub>+N). Error bars = sd, n = 3-6.

307 diacetate was incubated with cells at different timepoints during nutrient deprivation. We  
308 found that ROS levels increased in all nutrient deprived conditions in the first two days but  
309 were highest in those cells deprived of B<sub>12</sub> alone (Fig. 3B). This peak coincided with the start  
310 of the substantial decline in cell viability (Fig. 3A). The combination of B<sub>12</sub> and nitrogen  
311 deprivation reduced ROS levels to similar amounts to those seen in the nitrogen-deprived  
312 cells, and so may be a factor behind reduced cell death.

313

### 314 **Natural B<sub>12</sub> auxotroph *Lobomonas rostrata* fares better under B<sub>12</sub> limiting conditions** 315 **than *metE7***

316 Considering that *metE7* quickly lost viability in the absence of B<sub>12</sub> while nitrogen  
317 starvation invoked protective responses independent of B<sub>12</sub> status, it is possible that as a  
318 novel auxotroph *metE7*'s response to B<sub>12</sub> deprivation is simply underdeveloped. To test this  
319 we compared the B<sub>12</sub> physiology of *metE7* with *Lobomonas rostrata*, a naturally B<sub>12</sub>-  
320 dependent member of the same Volvocaceae family of chlorophyte algae (32, 33). Cell  
321 viability was significantly greater in *L. rostrata* cells compared to the *metE7* line after 2-4

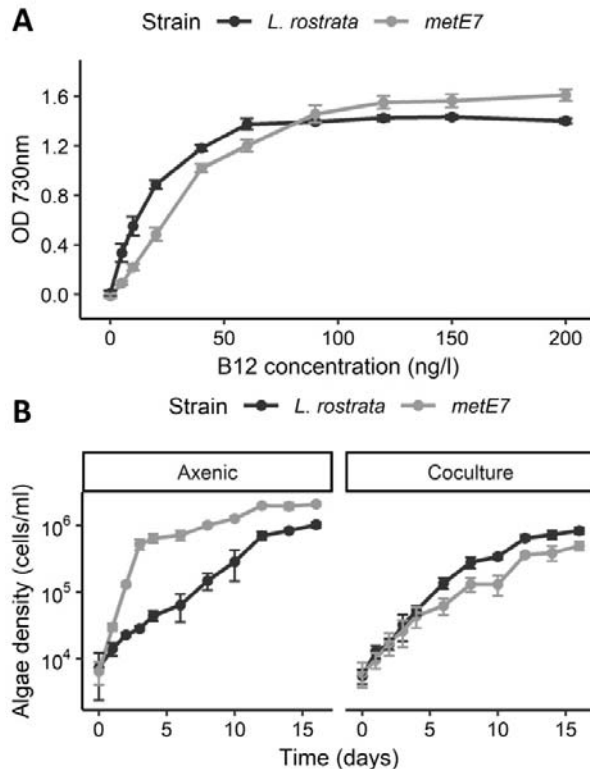

**Figure 4.** *L. rostrata* grows better than *metE7* in coculture with a B<sub>12</sub> producing bacterium, in part due to its lower demand for B<sub>12</sub>. **(A)** Cultures were grown mixotrophically (TAP medium in continuous light), B<sub>12</sub> concentrations ranged from 0 to 200 ng·l<sup>-1</sup> and precultures of the algae, which were grown with 200 ng·l<sup>-1</sup> B<sub>12</sub>, were washed thrice and inoculated at a density of roughly 100 cells·ml<sup>-1</sup>. Culture density was measured as optical density at 730 nm after 5 days of growth for the *C. reinhardtii* strains and 9 days for *L. rostrata*. **(B)** Cultures were grown photoautotrophically (Tris minimal media in 16h:8h light:dark cycles) in axenic culture (with 100 ng·l<sup>-1</sup> B<sub>12</sub>) or coculture (with the B<sub>12</sub>-producing bacterium *M. loti*) over a period of 16 days with measurements of cell density every 1-2 days. For both panel A and B, black = *L. rostrata*, grey = *metE7*, error bars = sd, n=4.

322 days of B<sub>12</sub> deprivation despite also growing to a greater density (Fig S7A). Moreover, a B<sub>12</sub>  
 323 dose-response experiment, in which the two species were each cultured mixotrophically in a  
 324 range of B<sub>12</sub> concentrations, revealed that *L. rostrata* reached a higher optical density than  
 325 *metE7* at all B<sub>12</sub> concentrations below 90 ng·l<sup>-1</sup>, while the inverse was true above 90 ng·l<sup>-1</sup>  
 326 (Fig 4A). This indicates that *L. rostrata* has a lower B<sub>12</sub> requirement than *metE7*.

327 In the natural environment the ultimate source of B<sub>12</sub> is from prokaryotes since they  
 328 are the only known B<sub>12</sub> producers (34). In separate studies it was shown that B<sub>12</sub>-dependent  
 329 growth of *L. rostrata* and *metE7* can be supported by the B<sub>12</sub> synthesising bacterium  
 330 *Mesorhizobium loti* (17, 35). We therefore compared directly the growth of *metE7* and *L.*  
 331 *rostrata* in B<sub>12</sub>-supplemented (100 ng·l<sup>-1</sup>) axenic culture and in coculture with *M. loti* in media  
 332 lacking a carbon source (TP) (Fig 4A). Even though *metE7* grew much more quickly and to a

333 higher density than *L. rostrata* under axenic, B<sub>12</sub>-supplemented conditions, it grew less well  
334 in coculture with *M. loti* (Fig. 4B), indicating B<sub>12</sub> provision from the bacterium is less effective  
335 at supporting the growth of metE7 than of *L. rostrata*, perhaps simply due to their different  
336 B<sub>12</sub> requirements, but possibly due to more sophisticated symbiotic interactions.

337

### 338 **Experimental evolution in coculture improves B<sub>12</sub>-use efficiency and resilience to B<sub>12</sub>** 339 **deprivation**

340 Together our data suggest that the newly evolved metE7 line is poorly adapted to  
341 coping with B<sub>12</sub> deprivation, but we wanted to determine whether the metE7 line could evolve  
342 improved tolerance to B<sub>12</sub> limiting conditions, so we employed an experimental evolution  
343 approach. We designed three distinct conditions, referred to as H, L and C. Condition H  
344 (TAP medium with high (1000 ng·l<sup>-1</sup>) B<sub>12</sub>) was a continuation of the conditions that had  
345 initially generated *metE7* (17). Condition L (TAP medium with low (25 ng·l<sup>-1</sup>) B<sub>12</sub>) was chosen  
346 so that B<sub>12</sub> would limit growth. Condition C (coculture with *M. loti* in TP medium) was a  
347 simplification of an environmental microbial community. Eight independent cultures for each  
348 condition were established from a single colony and then subcultured once per week over a  
349 total period of 10 months. To account for the different growth rates in the three conditions,  
350 we applied the following dilution rates of 10,000, 100, and 5 times per week in condition H, L  
351 and C respectively (Fig S8). After 10 months under selective conditions all 24 cultures had  
352 survived and were then treated with antibiotics to remove the *M. loti* from condition C and to  
353 ensure that there were no other contaminating bacteria. We then subcultured the lines in  
354 mixotrophic conditions with TAP + 200 ng·l<sup>-1</sup> B<sub>12</sub> three times over nine days to ensure they  
355 were all acclimated to the same conditions. The behaviours of the algal populations,  
356 hereafter referred to as metE7H, metE7L, and metE7C, were then compared alongside the  
357 progenitor metE7 line, which had been maintained on TP agar with 1000 ng·l<sup>-1</sup> B<sub>12</sub> without  
358 subculturing.

359 Under high levels of B<sub>12</sub> (320 ng·l<sup>-1</sup>) a similar optical density was reached by the  
360 progenitor metE7 strain and the metE7H and metE7C populations, whereas metE7L growth  
361 was somewhat compromised (Fig. S10A). When grown across a range of B<sub>12</sub> concentrations  
362 to determine a dose response, the metE7C populations reached a significantly higher optical  
363 density at the lower concentrations of 20 and 40 ng·l<sup>-1</sup> B<sub>12</sub> than the other lines (Fig. 5A). The  
364 concentration of B<sub>12</sub> required to produce half the maximum growth (EC<sub>50</sub>) of metE7C was  
365 therefore much lower than the progenitor metE7 or metE7H (Fig. S10B) and this was  
366 reflected in the higher B<sub>12</sub> use efficiency i.e. the maximal increase in yield (OD<sub>730</sub>) that results  
367 from an increase in B<sub>12</sub> concentration (Fig. 5B). However, the maximal growth rate of  
368 metE7C was significantly lower (Fig. S10C), and it is tempting to conclude that this is a  
369 necessary trade-off. We also compared the viability of the experimentally evolved lines

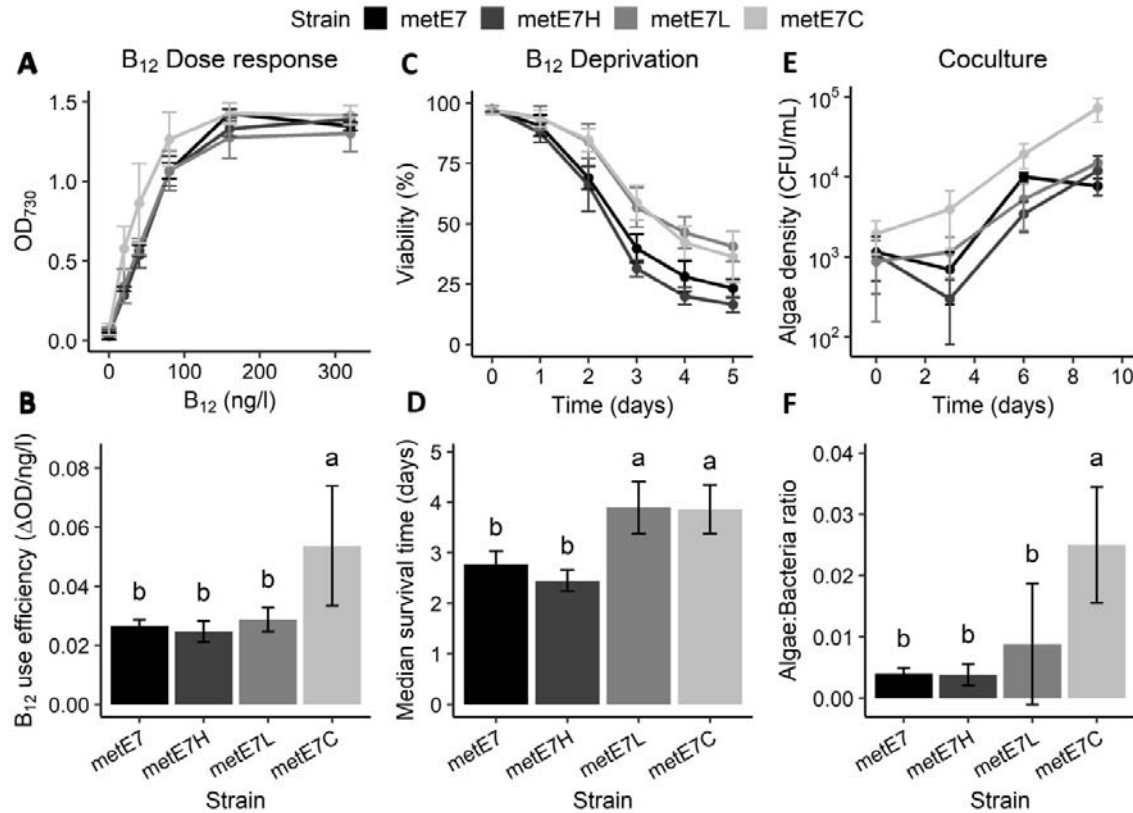

**Figure 5.** Experimental coevolution of *metE7* with the bacterium *M. loti* selects for improved algal growth in coculture, increased B<sub>12</sub> use efficiency and better resilience to B<sub>12</sub> deprivation. **(A)** Maximum optical density achieved by mixotrophically-grown cultures of experimentally evolved lines of *metE7* grown over a period of 12 days in six different concentrations of B<sub>12</sub>. **(B)** B<sub>12</sub> use efficiency of evolved lines calculated using a fitted Monod equation and expressed as the maximum rate of increase in OD<sub>730</sub> that would result from an increase in B<sub>12</sub> concentration. **(C)** Viability (measured as the percentage of cells capable of forming colonies on B<sub>12</sub>-replete agar) of mixotrophically-grown cultures of experimentally evolved lines of *metE7* over a 5-day period cultured in 40 ng·l<sup>-1</sup> B<sub>12</sub>. **(D)** Median survival time of evolved lines after dilution of culture to 40 ng·l<sup>-1</sup> B<sub>12</sub> calculated using a fitted Verhulst equation. **(E)** Algal cell density of photoautotrophically-grown cocultures of experimentally evolved lines of *metE7* with *M. loti* over a 9-day period. **(F)** Ratio of algae to bacteria on the final day (day 9) of growth in coculture. *metE7H* = *metE7* evolved in TAP + 1000 ng·l<sup>-1</sup> B<sub>12</sub> for 10 months, *metE7L* = *metE7* evolved in TAP media + 25 ng·l<sup>-1</sup> B<sub>12</sub>, *metE7C* = *metE7* evolved in Tris minimal medium in coculture with the B<sub>12</sub>-producing bacterium *M. loti*. Error bars = 95% confidence interval, n = 7-8, letters above error bars indicate statistical groupings provided by Tukey's test, which was performed following a significant ANOVA result.

370 during B<sub>12</sub> deprivation (Fig. 5C). Fig. 5C shows that although all lines lost viability during B<sub>12</sub>  
 371 deprivation, *metE7L* and *metE7C* survived substantially better, with a median survival time  
 372 more than a day longer (Fig. 5D) than both the progenitor *metE7* and *metE7H*.

373

374 To elucidate which factors contributed to the improved survival, we performed a multi-  
 375 parameter physiological analysis (Fig. S11). 16 parameters were measured across the 32  
 376 *metE7* populations and the dataset visualised in three ways. Fig S11A presents the data as  
 377 a heatmap with the most similar populations, which generally were those exposed to the  
 378 same evolution conditions, clustered together to form a phylogenetic tree. Fig. S11B displays  
 379 the first two components of a principal component analysis of the data, which confirmed that  
 380 the experimental evolution populations tended to form separate clusters. Fig. S11C is a  
 381 correlation matrix of the parameters to reveal those pairs that are most positively or

382 negatively correlated with one another. A more definitive statistical approach was then used  
383 to determine the most important parameters for predicting survival time during B<sub>12</sub>  
384 deprivation: Using stepwise minimisation of the Bayesian information criterion of the full  
385 linear model the 15 other parameters were reduced to just three. So, it was concluded that  
386 higher B<sub>12</sub> use efficiency, lower ROS levels and lower maximal growth rate were sufficient to  
387 explain longer survival time under B<sub>12</sub> deprivation of the metE7 populations.

388

389         Comparison of the growth of the evolved lines when cocultured with *M. loti* showed,  
390 perhaps unsurprisingly, that the metE7C lines grew better than the others (Fig 5E), and at  
391 the end of the growth period had a significantly higher number of algae supported per  
392 bacterium (Fig 5F). This algal:bacterial ratio was also optimally predicted by three  
393 parameters: higher algal B<sub>12</sub> use efficiency and lower algal maximal growth rate, as for  
394 survival time, but also lower algal B<sub>12</sub> uptake capacity. Together these results indicate that  
395 experimental evolution in coculture not only improves growth in coculture but also increases  
396 B<sub>12</sub> use-efficiency and survival during B<sub>12</sub> deprivation.

397

398



## 399 Discussion

400

401 In this study we exploited a novel model system for the evolution of vitamin B<sub>12</sub>  
402 dependence by analysing the physiological and metabolic responses to B<sub>12</sub> deprivation of an  
403 artificially evolved B<sub>12</sub>-dependent mutant of *C. reinhardtii*. Our analyses demonstrate that B<sub>12</sub>  
404 deprivation has important consequences for C1 metabolism: we observed a significant  
405 increase in the transcript abundance of C1 cycle enzymes in both the wild type and metE7  
406 strain, and a decrease in the methylation index (SAM:SAH ratio) in metE7 only. Moreover,  
407 B<sub>12</sub> deprivation of metE7 causes a decrease in chlorophyll, protein and amino acids, and an  
408 increase in starch, lipids and saturated fatty acids, characteristic of limitation responses to  
409 macronutrients such as nitrogen. The rapid loss of viability seen under B<sub>12</sub> deprivation can  
410 be averted if the metE7 cells are also limited for nitrogen, suggesting that it is not the lack of  
411 B<sub>12</sub> *per se* that causes cell death, but an inability to respond appropriately. Together this  
412 suggests a newly evolved B<sub>12</sub> auxotroph would be poorly adapted to surviving in the natural  
413 environment where a B<sub>12</sub> supply is not guaranteed. However, we found that metE7 can be  
414 supported for several months by a B<sub>12</sub>-producing bacterium, and experimental evolution  
415 under these conditions caused improved B<sub>12</sub> use efficiency and resilience to B<sub>12</sub> deprivation.

416 B<sub>12</sub> deprivation of metE7 decreased the SAM:SAH ratio 10-fold, similar to what was  
417 reported in a recent B<sub>12</sub> deprivation study of the diatom *T. pseudonana* (13). As SAH is a  
418 competitive inhibitor of methyltransferases(36), this decrease would likely lead to general  
419 hypomethylation in metE7. The epigenetic marks methyldeoxyadenosine and methylcytosine  
420 are similarly abundant in *C. reinhardtii* and appear to mark active genes and repeat-rich  
421 regions respectively, so the consequences of hypomethylation are unclear (37, 38). The  
422 reduced abundance of B<sub>12</sub>-bound METH under B<sub>12</sub> deprivation would hinder methionine  
423 synthesis and could cause the observed reduction in protein abundance (Fig. 2B). However,  
424 methionine levels increased between 12 and 24h of B<sub>12</sub> deprivation (Fig S1B), suggesting a  
425 reduction in its use, proteolysis, or increased synthesis due to higher METH expression or  
426 via alternative pathways such as the S-methylmethionine cycle, as documented in plants  
427 (39).

428 *METE* transcript abundance showed a much higher dynamic range than *METH* during  
429 B<sub>12</sub> deprivation and add-back (Fig. S2A), which is reflected by the higher diurnal range of  
430 *METE* observed in global transcriptomics and proteomics datasets (40). However, on  
431 average *METE* is around 60-fold more abundant than *METH* in *C. reinhardtii* (40). This may  
432 be due to a lower maximal catalytic rate of *METE*, as has been observed in *E. coli* (41), or  
433 due to its role in the flagella, which contain *METE* but not *METH* (42). Under B<sub>12</sub> deprivation  
434 conditions the activity of *METH* would be compromised, yet in both metE7 and the ancestral

435 strains it was upregulated. This is more similar to the B<sub>12</sub> dependent algae *T. pseudonana*  
436 and *Tisochrysis lutea*, which also upregulate *METH* on B<sub>12</sub> deprivation (12, 43), than the B<sub>12</sub>  
437 independent *P. tricornutum*, which decreases *METH* expression (44). However, in both *T.*  
438 *pseudonana* and *P. tricornutum* B<sub>12</sub> deprivation substantially upregulates C1 cycle enzymes  
439 including homologs of *METM*, *MTHFR* and *SAH1* (12), reflecting our findings and those of  
440 Helliwell et al. (2014) (45). Under sulfur and nitrogen deprivation conditions these C1 cycle  
441 genes are downregulated, suggesting that their upregulation during B<sub>12</sub> deprivation is not a  
442 general response to nutrient stress, but a nutrient-specific one, as indeed is the case for *T.*  
443 *lutea* (43, 46, 47).

444 Chlorosis is a common symptom of nutrient deficiency in *C. reinhardtii*, evident in  
445 nitrogen, sulfur, iron, and zinc limiting conditions and so it is not surprising that B<sub>12</sub>  
446 deprivation of metE7 caused a substantial decline in total chlorophyll (Fig. 2B) (48–50). The  
447 decrease in total protein content occurred more slowly and was less substantial (50%  
448 reduction over four days) than reported under nitrogen and sulphur deprivation (80%  
449 reduction within one day) (51). During nitrogen and iron starvation in *C. reinhardtii*  
450 membrane lipids decrease drastically concomitant with the increase in TAGs (52, 53). This is  
451 very much like what we observed for metE7 under B<sub>12</sub> deprivation, although here the level of  
452 free fatty acids and polar lipids decreased by a roughly similar amount to the increase in  
453 TAGs indicating there is little to no *de novo* fatty acid synthesis. In addition, B<sub>12</sub> deprivation  
454 causes similar shifts in fatty acid composition to nitrogen and iron deprivation, most notably a  
455 substantial increase in palmitic acid (16:0) and decrease in polyunsaturated 16:4 fatty acid  
456 (53, 54). Despite these similarities, B<sub>12</sub> deprivation may elicit an increase in TAGs by a  
457 different pathway due to disrupted C1 metabolism, as has been observed in several  
458 organisms (55–57). This is thought to be due to a reduction in the methylation potential  
459 limiting membrane lipid synthesis and hence diverting more lipids towards TAGs (57, 58).  
460 Therefore, B<sub>12</sub> deprivation could provide a complementary approach to other nutrient  
461 deprivation experiments in improving our understanding of lipid metabolism in *C. reinhardtii*  
462 and other algae.

463 From an evolutionary perspective, the prevalence of vitamin B<sub>12</sub> dependence among  
464 algae appears somewhat at odds with the severe fitness penalties that would be incurred  
465 given limiting dissolved B<sub>12</sub> concentrations, particularly when the fitness benefit in replete B<sub>12</sub>  
466 is marginal (17). However, relative to optimal axenic laboratory conditions in which the  
467 metE7 line evolved, in the environment multiple nutrients may colimit growth perhaps even  
468 eliciting responses that mitigate against B<sub>12</sub> deprivation, as we observed here, and B<sub>12</sub>-  
469 producing bacteria may not simply co-occur with algae but also actively engage in

470 mutualistic interactions (1, 35, 59, 60). Furthermore, our evidence suggests that selection  
471 under coculture conditions led to the newly evolved B<sub>12</sub> auxotroph developing increased B<sub>12</sub>  
472 use efficiency and becoming better adapted to tolerating B<sub>12</sub> limitation, which could make  
473 this line more robust to the unreliable B<sub>12</sub> supply in the natural environment. However, these  
474 improvements appeared to come at the expense of maximal growth rate in B<sub>12</sub> replete  
475 conditions (Fig. S10C), which is not unexpected in light of previous experimental evolution  
476 studies in *C. reinhardtii* (61). As one of the conserved responses of *C. reinhardtii* upon  
477 detecting depletion of various nutrients is to decrease cell division, it is possible that slower  
478 growth might even be selected for under B<sub>12</sub> deprivation. Indeed, a low growth rate was  
479 found to be a significant predictor of greater survival time under B<sub>12</sub> deprivation, alongside  
480 low ROS levels and high B<sub>12</sub> use efficiency.

481 The fact that metE7 survived a 10-month period either with limited artificial  
482 supplementation of B<sub>12</sub> or by relying completely on bacterial B<sub>12</sub> provision, does suggest that  
483 even a newly evolved and poorly adapted B<sub>12</sub> auxotroph would have ample opportunity to  
484 adapt further. What adaptations are likely to improve growth and survival under B<sub>12</sub>  
485 deprivation are not altogether clear, but it is not unreasonable to assume that exaptation of  
486 existing nutrient limitation responses would play a major role. B<sub>12</sub> dependence is certainly a  
487 risky evolutionary strategy, and one which may have ended in extinction countless times, but  
488 our work suggests that even the simplest of symbioses with B<sub>12</sub>-producing bacteria may be  
489 sufficient to ensure the survival and drive the continued evolution of B<sub>12</sub>-dependent algae.

#### 490 **Acknowledgements**

491

492 This work was supported by the BBSRC Doctoral Training Partnership BB/M011194/1 (FB,  
493 AGS), BBSRC BB/M018180/1 (PM, AGS), BB/I013164/1 (KEH & AGS), Leverhulme Trust  
494 RPG 2017-077 (MPD, AGS), Natural Environment Research Council NE/R015449/1 (KEH).

495

#### 496 **Competing interests**

497 The authors declare no competing interests.

498

#### 499 **Author contributions**

500

501 F.B., P.M. and A.G.S designed the research; F.B., D.L.S. and A.H. performed the research;  
502 N.S., D.L.S. and M.P.D. contributed new reagents or analytic tools; F.B. and D.L.S. analysed  
503 the data; F.B., A.G.S., K.E.H. and P.M. wrote the paper with input from all authors.

504

505

506

## Parsed Citations

1. Croft MT, Lawrence AD, Raux-Deery E, Warren MJ, Smith AG (2005) Algae acquire vitamin B12 through a symbiotic relationship with bacteria. *Nature* 438(7064):90–3.  
Pubmed: [Author and Title](#)  
Google Scholar: [Author Only](#) [Title Only](#) [Author and Title](#)
2. Panzeca C, et al. (2009) Distributions of dissolved vitamin B12 and Co in coastal and open-ocean environments. *Estuar Coast Shelf Sci* 85(2):223–230.  
Pubmed: [Author and Title](#)  
Google Scholar: [Author Only](#) [Title Only](#) [Author and Title](#)
3. Sañudo-Wilhelmy SA, et al. (2012) Multiple B-vitamin depletion in large areas of the coastal ocean. *Proc Natl Acad Sci* 109(35):14041–14045.  
Pubmed: [Author and Title](#)  
Google Scholar: [Author Only](#) [Title Only](#) [Author and Title](#)
4. Gobler C, Norman C, Panzeca C, Taylor G, Sañudo-Wilhelmy S (2007) Effect of B-vitamins (B1, B12) and inorganic nutrients on algal bloom dynamics in a coastal ecosystem. *Aquat Microb Ecol* 49:181–194.  
Pubmed: [Author and Title](#)  
Google Scholar: [Author Only](#) [Title Only](#) [Author and Title](#)
5. Panzeca C, et al. (2008) Potential cobalt limitation of vitamin B12 synthesis in the North Atlantic Ocean. *Global Biogeochem Cycles* 22(2):n/a-n/a.  
Pubmed: [Author and Title](#)  
Google Scholar: [Author Only](#) [Title Only](#) [Author and Title](#)
6. Ohwada K (1973) Seasonal Cycles of Vitamin B12, Thiamine and Biotin in Lake Sagami. Patterns of Their Distribution and Ecological Significance. *Int Rev der gesamten Hydrobiol und Hydrogr* 58(6):851–871.  
Pubmed: [Author and Title](#)  
Google Scholar: [Author Only](#) [Title Only](#) [Author and Title](#)
7. Sañudo-Wilhelmy SA, Gobler CJ, Okbari Michael M, Taylor GT (2006) Regulation of phytoplankton dynamics by vitamin B 12. *Geophys Res Lett* 33(4):L04604.  
Pubmed: [Author and Title](#)  
Google Scholar: [Author Only](#) [Title Only](#) [Author and Title](#)
8. Bertrand EM, et al. (2007) Vitamin B12 and iron colimitation of phytoplankton growth in the Ross Sea. *Limnol Oceanogr* 52(3):1079–1093.  
Pubmed: [Author and Title](#)  
Google Scholar: [Author Only](#) [Title Only](#) [Author and Title](#)
9. Browning TJ, et al. (2017) Nutrient co-limitation at the boundary of an oceanic gyre. *Nature* 551(7679):242.  
Pubmed: [Author and Title](#)  
Google Scholar: [Author Only](#) [Title Only](#) [Author and Title](#)
10. Cohen NR, et al. (2017) Iron and vitamin interactions in marine diatom isolates and natural assemblages of the Northeast Pacific Ocean. *Limnol Oceanogr* 62(5):2076–2096.  
Pubmed: [Author and Title](#)  
Google Scholar: [Author Only](#) [Title Only](#) [Author and Title](#)
11. Helliwell KE, Wheeler GL, Leptos KC, Goldstein RE, Smith AG (2011) Insights into the evolution of vitamin B12 auxotrophy from sequenced algal genomes. *Mol Biol Evol* 28(10):2921–33.  
Pubmed: [Author and Title](#)  
Google Scholar: [Author Only](#) [Title Only](#) [Author and Title](#)
12. Bertrand EM, et al. (2012) Influence of cobalamin scarcity on diatom molecular physiology and identification of a cobalamin acquisition protein. *Proc Natl Acad Sci* 109(26):E1762-71.  
Pubmed: [Author and Title](#)  
Google Scholar: [Author Only](#) [Title Only](#) [Author and Title](#)
13. Heal KR, Kellogg NA, Carlson LT, Lionheart RM, Ingalls AE (2019) Metabolic Consequences of Cobalamin Scarcity in the Diatom *Thalassiosira pseudonana* as Revealed Through Metabolomics. *Protist* 170(3):328–348.  
Pubmed: [Author and Title](#)  
Google Scholar: [Author Only](#) [Title Only](#) [Author and Title](#)
14. Ellis KA, Cohen NR, Moreno C, Marchetti A (2017) Cobalamin-independent Methionine Synthase Distribution and Influence on Vitamin B12 Growth Requirements in Marine Diatoms. *Protist* 168(1):32–47.  
Pubmed: [Author and Title](#)  
Google Scholar: [Author Only](#) [Title Only](#) [Author and Title](#)
15. Helliwell KE, Wheeler GL, Smith AG (2013) Widespread decay of vitamin-related pathways: coincidence or consequence? *Trends Genet* 29(8):469–78.  
Pubmed: [Author and Title](#)

Google Scholar: [Author Only](#) [Title Only](#) [Author and Title](#)

- 16. Helliwell KE (2017) The roles of B vitamins in phytoplankton nutrition: new perspectives and prospects. *New Phytol* 216(1):62–68.**  
Pubmed: [Author and Title](#)  
Google Scholar: [Author Only](#) [Title Only](#) [Author and Title](#)
- 17. Helliwell KE, et al. (2015) Fundamental shift in vitamin B12 eco-physiology of a model alga demonstrated by experimental evolution. *ISME J* 12:1–10.**  
Pubmed: [Author and Title](#)  
Google Scholar: [Author Only](#) [Title Only](#) [Author and Title](#)
- 18. Dubini A, Mus F, Seibert M, Grossman AR, Posewitz MC (2009) Flexibility in anaerobic metabolism as revealed in a mutant of *Chlamydomonas reinhardtii* lacking hydrogenase activity. *J Biol Chem* 284(11):7201–7213.**  
Pubmed: [Author and Title](#)  
Google Scholar: [Author Only](#) [Title Only](#) [Author and Title](#)
- 19. Rochaix J-D (1995) *Chlamydomonas reinhardtii* as the Photosynthetic Yeast. *Annu Rev Genet* 29(1):209–230.**  
Pubmed: [Author and Title](#)  
Google Scholar: [Author Only](#) [Title Only](#) [Author and Title](#)
- 20. Grossman A (2000) Acclimation of *Chlamydomonas reinhardtii* to its Nutrient environment. *Protist* 151(3):201–224.**  
Pubmed: [Author and Title](#)  
Google Scholar: [Author Only](#) [Title Only](#) [Author and Title](#)
- 21. Ferenczi A, Pyott DE, Xipnitou A, Molnar A Efficient targeted DNA editing and replacement in *Chlamydomonas reinhardtii* using Cpf1 ribonucleoproteins and single-stranded DNA. doi:10.1073/pnas.1710597114.**  
Pubmed: [Author and Title](#)  
Google Scholar: [Author Only](#) [Title Only](#) [Author and Title](#)
- 22. Davey MP, et al. (2014) Triacylglyceride production and autophagous responses in *Chlamydomonas reinhardtii* depend on resource allocation and carbon source. *Eukaryot Cell* 13(3):392–400.**  
Pubmed: [Author and Title](#)  
Google Scholar: [Author Only](#) [Title Only](#) [Author and Title](#)
- 23. Helliwell KE, et al. (2018) Quantitative proteomics of a B12-dependent alga grown in coculture with bacteria reveals metabolic tradeoffs required for mutualism. *New Phytol* 217(2):599–612.**  
Pubmed: [Author and Title](#)  
Google Scholar: [Author Only](#) [Title Only](#) [Author and Title](#)
- 24. Helliwell KE, et al. (2018) Quantitative proteomics of a B 12 -dependent alga grown in coculture with bacteria reveals metabolic tradeoffs required for mutualism. *New Phytol* 217(2):599–612.**  
Pubmed: [Author and Title](#)  
Google Scholar: [Author Only](#) [Title Only](#) [Author and Title](#)
- 25. Ducker GS, Rabinowitz JD (2017) Cell Metabolism Review One-Carbon Metabolism in Health and Disease. *Cell Metab* 25:27–42.**  
Pubmed: [Author and Title](#)  
Google Scholar: [Author Only](#) [Title Only](#) [Author and Title](#)
- 26. Lieber CS, Packer L (2002) S-Adenosylmethionine: molecular, biological, and clinical aspects-an introduction. *Am J Clin Nutr* 76(5):1148S-1150S.**  
Pubmed: [Author and Title](#)  
Google Scholar: [Author Only](#) [Title Only](#) [Author and Title](#)
- 27. White S, Anandraj A, Bux F (2011) PAM fluorometry as a tool to assess microalgal nutrient stress and monitor cellular neutral lipids. *Bioresour Technol* 102(2):1675–1682.**  
Pubmed: [Author and Title](#)  
Google Scholar: [Author Only](#) [Title Only](#) [Author and Title](#)
- 28. Parkhill J-P, Maillet G, Cullen JJ (2001) Fluorescence-based maximal quantum yield for PSII as a diagnostic of nutrient stress. *J Phycol* 37(4):517–529.**  
Pubmed: [Author and Title](#)  
Google Scholar: [Author Only](#) [Title Only](#) [Author and Title](#)
- 29. Saroussi S, Sanz-Luque E, Kim RG, Grossman AR (2017) Nutrient scavenging and energy management: acclimation responses in nitrogen and sulfur deprived *Chlamydomonas*. *Curr Opin Plant Biol* 39:114–122.**  
Pubmed: [Author and Title](#)  
Google Scholar: [Author Only](#) [Title Only](#) [Author and Title](#)
- 30. Juergens MT, Disbrow B, Shachar-Hill Y (2016) The Relationship of Triacylglycerol and Starch Accumulation to Carbon and Energy Flows during Nutrient Deprivation in *Chlamydomonas reinhardtii*. *Plant Physiol* 171(4):2445–57.**  
Pubmed: [Author and Title](#)  
Google Scholar: [Author Only](#) [Title Only](#) [Author and Title](#)
- 31. Erickson E, Wakao S, Niyogi KK (2015) Light stress and photoprotection in *Chlamydomonas reinhardtii*. *Plant J* 82(3):449–465.**  
Pubmed: [Author and Title](#)

Google Scholar: [Author Only](#) [Title Only](#) [Author and Title](#)

**32. Provasoli L (1958) Nutrition and Ecology of Protozoa and Algae. Annu Rev Microbiol 12(1):279–308.**

Pubmed: [Author and Title](#)

Google Scholar: [Author Only](#) [Title Only](#) [Author and Title](#)

**33. Sausen N, Malavasi V, Melkonian M (2018) Molecular phylogeny, systematics, and revision of the type species of *Lobomonas*, *L. francei* (Volvocales, Chlorophyta) and closely related taxa. J Phycol 54(2):198–214.**

Pubmed: [Author and Title](#)

Google Scholar: [Author Only](#) [Title Only](#) [Author and Title](#)

**34. Warren MJ, Raux E, Schubert HL, Escalante-Semerena JC (2002) The biosynthesis of adenosylcobalamin (vitamin B12). Nat Prod Rep 19(4):390–412.**

Pubmed: [Author and Title](#)

Google Scholar: [Author Only](#) [Title Only](#) [Author and Title](#)

**35. Kazamia E, et al. (2012) Mutualistic interactions between vitamin B12 -dependent algae and heterotrophic bacteria exhibit regulation. Environ Microbiol 14(6):1466–76.**

Pubmed: [Author and Title](#)

Google Scholar: [Author Only](#) [Title Only](#) [Author and Title](#)

**36. Chiang PK, et al. (1996) S-Adenosylmethionine and methylation. FASEB 10:471–480.**

Pubmed: [Author and Title](#)

Google Scholar: [Author Only](#) [Title Only](#) [Author and Title](#)

**37. Fu Y, et al. (2015) N6-methyldeoxyadenosine marks active transcription start sites in *Chlamydomonas*. Cell 161(4):879–892.**

Pubmed: [Author and Title](#)

Google Scholar: [Author Only](#) [Title Only](#) [Author and Title](#)

**38. Lopez D, et al. (2015) Dynamic Changes in the Transcriptome and Methyloome of *Chlamydomonas reinhardtii* throughout Its Life Cycle. Plant Physiol 169(4):2730–43.**

Pubmed: [Author and Title](#)

Google Scholar: [Author Only](#) [Title Only](#) [Author and Title](#)

**39. Ranocha P, et al. (2001) The S-methylmethionine cycle in angiosperms: ubiquity, antiquity and activity. Plant J 25(5):575–584.**

Pubmed: [Author and Title](#)

Google Scholar: [Author Only](#) [Title Only](#) [Author and Title](#)

**40. Strenkert D, et al. (2019) Multiomics resolution of molecular events during a day in the life of *Chlamydomonas*. Proc Natl Acad Sci:201815238.**

Pubmed: [Author and Title](#)

Google Scholar: [Author Only](#) [Title Only](#) [Author and Title](#)

**41. Gonzalez JC, Banerjee R V, Huang S, Sumner JS, Matthews RG (1992) Comparison of Cobalamin-Independent and Cobalamin-Dependent Methionine Synthases from *Escherichia coli*. Biochemistry (31):6045–6056.**

Pubmed: [Author and Title](#)

Google Scholar: [Author Only](#) [Title Only](#) [Author and Title](#)

**42. Schneider MJ, Ulland M, Sloboda RD (2008) A Protein Methylation Pathway in *Chlamydomonas* Flagella Is Active during Flagellar Resorption. Mol Biol Cell 19(10):4319–4327.**

Pubmed: [Author and Title](#)

Google Scholar: [Author Only](#) [Title Only](#) [Author and Title](#)

**43. Nef C, et al. (2019) How haptophytes microalgae mitigate vitamin B12 limitation. Sci Rep 9(1):8417.**

Pubmed: [Author and Title](#)

Google Scholar: [Author Only](#) [Title Only](#) [Author and Title](#)

**44. Bertrand EM, et al. (2013) Methionine synthase interreplacement in diatom cultures and communities : Implications for the persistence of B 12 use by eukaryotic phytoplankton. 58(4):1431–1450.**

Pubmed: [Author and Title](#)

Google Scholar: [Author Only](#) [Title Only](#) [Author and Title](#)

**45. Helliwell KE, et al. (2014) Unraveling Vitamin B12-Responsive Gene Regulation in Algae. Plant Physiol 165(1):388–397.**

Pubmed: [Author and Title](#)

Google Scholar: [Author Only](#) [Title Only](#) [Author and Title](#)

**46. González-Ballester D, et al. (2010) RNA-Seq Analysis of Sulfur-Deprived *Chlamydomonas* Cells Reveals Aspects of Acclimation Critical for Cell Survival. Plant Cell 22(6):2058–2084.**

Pubmed: [Author and Title](#)

Google Scholar: [Author Only](#) [Title Only](#) [Author and Title](#)

**47. Wase N, Black PN, Stanley BA, Dirusso CC (2014) Integrated Quantitative Analysis of Nitrogen Stress Response in *Chlamydomonas reinhardtii* Using Metabolite and Protein Profiling. J Proteome Res 13:1373–1396.**

Pubmed: [Author and Title](#)

Google Scholar: [Author Only](#) [Title Only](#) [Author and Title](#)

48. Schmollinger S, et al. (2014) Nitrogen-Sparing Mechanisms in *Chlamydomonas* Affect the Transcriptome, the Proteome, and Photosynthetic Metabolism. *Plant Cell* 26(4):1410–1435.  
Pubmed: [Author and Title](#)  
Google Scholar: [Author Only Title Only Author and Title](#)
49. Juergens MT, et al. (2015) The regulation of photosynthetic structure and function during nitrogen deprivation in *Chlamydomonas reinhardtii*. *Plant Physiol* 167(2):558–73.  
Pubmed: [Author and Title](#)  
Google Scholar: [Author Only Title Only Author and Title](#)
50. Kropat J, et al. (2011) A revised mineral nutrient supplement increases biomass and growth rate in *Chlamydomonas reinhardtii*. *Plant J* 66(5):770–780.  
Pubmed: [Author and Title](#)  
Google Scholar: [Author Only Title Only Author and Title](#)
51. Cakmak T, et al. (2012) Differential effects of nitrogen and sulfur deprivation on growth and biodiesel feedstock production of *Chlamydomonas reinhardtii*. *Biotechnol Bioeng* 109(8):1947–1957.  
Pubmed: [Author and Title](#)  
Google Scholar: [Author Only Title Only Author and Title](#)
52. Siaut M, et al. (2011) Oil accumulation in the model green alga *Chlamydomonas reinhardtii*: Characterization, variability between common laboratory strains and relationship with starch reserves. *BMC Biotechnol* 11(1):7.  
Pubmed: [Author and Title](#)  
Google Scholar: [Author Only Title Only Author and Title](#)
53. Urzica EI, et al. (2013) Remodeling of membrane lipids in iron-starved *Chlamydomonas*. *J Biol Chem* 288(42):30246–30258.  
Pubmed: [Author and Title](#)  
Google Scholar: [Author Only Title Only Author and Title](#)
54. Msanne J, et al. (2012) Metabolic and gene expression changes triggered by nitrogen deprivation in the photoautotrophically grown microalgae *Chlamydomonas reinhardtii* and *Coccomyxa* sp. C-169. *Phytochemistry* 75:50–59.  
Pubmed: [Author and Title](#)  
Google Scholar: [Author Only Title Only Author and Title](#)
55. Meï CE, et al. (2016) C1 Metabolism Inhibition and Nitrogen Deprivation Trigger Triacylglycerol Accumulation in *Arabidopsis thaliana* Cell Cultures and Highlight a Role of NPC in Phosphatidylcholine-to-Triacylglycerol Pathway. *Front Plant Sci* 7:1–16.  
Pubmed: [Author and Title](#)  
Google Scholar: [Author Only Title Only Author and Title](#)
56. da Silva RP, Kelly KB, Al Rajabi A, Jacobs RL (2014) Novel insights on interactions between folate and lipid metabolism. *BioFactors* 40(3):277–283.  
Pubmed: [Author and Title](#)  
Google Scholar: [Author Only Title Only Author and Title](#)
57. Visram M, et al. (2018) Homocysteine regulates fatty acid and lipid metabolism in yeast. *J Biol Chem* 293(15):5544–5555.  
Pubmed: [Author and Title](#)  
Google Scholar: [Author Only Title Only Author and Title](#)
58. Malanovic N, et al. (2008) S-adenosyl-L-homocysteine hydrolase, key enzyme of methylation metabolism, regulates phosphatidylcholine synthesis and triacylglycerol homeostasis in yeast: Implications for homocysteine as a risk factor of atherosclerosis. *J Biol Chem* 283(35):23989–23999.  
Pubmed: [Author and Title](#)  
Google Scholar: [Author Only Title Only Author and Title](#)
59. Cooper MB, et al. (2019) Cross-exchange of B-vitamins underpins a mutualistic interaction between *Ostreococcus tauri* and *Dinoroseobacter shibae*. *ISME J* 13(2):334–345.  
Pubmed: [Author and Title](#)  
Google Scholar: [Author Only Title Only Author and Title](#)
60. Kazamia E, Helliwell KE, Purton S, Smith AG (2016) How mutualisms arise in phytoplankton communities: building eco-evolutionary principles for aquatic microbes. *Ecol Lett* 19(7):810–822.  
Pubmed: [Author and Title](#)  
Google Scholar: [Author Only Title Only Author and Title](#)
61. Collins S, Bell G (2004) Phenotypic consequences of 1,000 generations of selection at elevated CO<sub>2</sub> in a green alga. *Nature* 431(7008):566–569.  
Pubmed: [Author and Title](#)  
Google Scholar: [Author Only Title Only Author and Title](#)
